# Supplementary material for: Surveys that prioritize site number over time per site will result in better gastropod status assessments: a case study on the rediscovery of Big Black Rocksnail
Source: Springer Nature journal article supplement (doi:10.1007/s10531-024-02829-6), 2024-03-25
Supplement: MOESM1 [file 26914368]

**Supplementary Tables**

Table S1. *Lithasia hubrichti* museum collections, locations, and dates*.*

| Museum | Catalogue number | Date | Location | Number of individuals |
| --- | --- | --- | --- | --- |
| MCZ | 250916 (Holotype) | 10/12/1963 | Big Black River, 4.8 km NW of Edwards, Hinds Co., Mississippi | 1 (Dry) |
| MCZ | 233392 (Paratype) | 10/12/1963 | Big Black River, 4.8 km NW of Edwards, Hinds Co., Mississippi | 29 (Dry) |
| ANSP | 318058 | 10/12/1963 | Big Black River, 4.8 km NW of Edwards, Hinds Co., Mississippi | 23 (Dry) |
| UMMZ | 244872 | 7/21/1962 | Big Black River, 4.8 km NW of Edwards, Hinds Co., Mississippi | 5 (Dry) |
| UMMZ | 244873 | 10/12/1963 | Big Black River, 4.8 km NW of Edwards, Hinds Co., Mississippi | 30 (Dry) |
| NCSM | 59904 | 9/14/1964 | Big Black River, 4.8 km NW of Edwards, Hinds Co., Mississippi | 18 (Dry) |
| OSM | 12319 (Paratype) | 9/14/1964 | Big Black River, 4.8 km NW of Edwards, Hinds Co., Mississippi | 2 (Dry) |
| OSM | 13238 (Paratype) | 10/12/1963 | Big Black River, 4.8 km NW of Edwards, Hinds Co., Mississippi | 2 (Dry) |
| USNM | 636136 | 10/12/1963 | Big Black River, 4.8 km NW of Edwards, Hinds Co., Mississippi | 34 (Dry) |
| MMNS | 15473 | 10/11/2021 | Big Black River, 9.7 km N of Edwards, Hinds Co., Mississippi | 1 (Dry) |
| MMNS | 17126 | 10/21/2022 | Big Black River, 9.7 km N of Edwards, Hinds Co., Mississippi | 55 (Ethanol)  12 (dry) |
| MMNS | 17130 | 10/21/2022 | Big Black River, 9.7 km N of Edwards, Hinds Co., Mississippi | 5 (Ethanol) |
| MMNS | 18036 | 8/30/2023 | Big Black River, 1.1 river km upstream of I-20, Hinds Co., Mississippi | 12 (Ethanol) |
| MMNS | 18040 | 8/30/2023 | Big Black River, 4.2 river km upstream of I-20, Hinds Co., Mississippi | 16 (Ethanol) |
| MMNS | 18052 | 8/30/2023 | Big Black River, 4.8 river km upstream of I-20, Hinds Co. Mississippi | 3 (Ethanol) |

MCZ = Museum of Comparative Zoology; ANSP = Academy of Natural Sciences of Philadelphia; UMMZ = University of Michigan Museum of Zoology; NCSM = North Carolina State Museum of Natural Science; OSM = The Ohio State University Museum of Biological Diversity; USNM = Smithsonian National Museum of Natural History; MMNS = Mississippi Museum of Natural Science

Table S2. Genomic dataset characteristics.

| Dataset | Number of Loci | Loci with at least one SNP | SNPs | Missing data (%) |
| --- | --- | --- | --- | --- |
| R80_maf025_multi | 6161 | 2102 | 4762 | 4.3 |
| R80_maf025_single | 6161 | 2102 | 2102 | 4.1 |
| R100_maf001_Multi | 4115 | 1381 | 2967 | 0 |
| R100_maf001_single_HWE-removed | 4077 | 1343 | 1343 | 0 |

Table S3. FSC2 demographic parameter estimates and Akaike information criteria (AIC, ΔAIC, Weighted AIC) for eight models. Parameters NCUR, NANC, NBOT1, and NBOT2 are effective population sizes. Parameters TCUR, TBOT1, and TBOT2 timing of demographic events in generation times, but values are also interpreted in years assuming a 1-year generation time for pleurocerids. Refer to Figure 2 in the main text for more information on each model.

| **Model** | **Name** | ***k*** | **Max Est Lhood** | **AIC** | **ΔAIC** | ***wi*** |  |  |  |  |
| --- | --- | --- | --- | --- | --- | --- | --- | --- | --- | --- |
| Model A | Constant Population | 1 | -2757.996 | 12,705 | 346 | 0.000 |  |  |  |  |
| Model B | Exponential Growth | 3 | -2688.199 | 12,388 | 29 | 0.000 |  |  |  |  |
| Model C | One Bottleneck | 3 | -2757.906 | 12,709 | 350 | 0.000 |  |  |  |  |
| Model D | One Bottleneck + Instantaneous Growth | 5 | -2683.156 | 12,369 | 10 | 0.007 |  |  |  |  |
| **Model E** | **One Bottlenecks + Exponential Growth** | **6** | **-2680.583** | **12,359** | **0** | **0.993** |  |  |  |  |
| Model F | Two Bottleneck | 5 | -2757.798 | 12,712 | 353 | 0.000 |  |  |  |  |
| Model G | Two Bottlenecks + Instantaneous Growth | 7 | -2689.637 | 12,402 | 43 | 0.000 |  |  |  |  |
| Model H | Two Bottlenecks + Exponential Growth | 8 | -2757.786 | 12,718 | 359 | 0.000 |  |  |  |  |
|  |  |  |  |  |  |  |  |  |  |  |
| **Model** | **Name** | ***k*** | **NCUR** | **NANC** | **NBOT1** | **NBOT2** | **TCUR** | **TBOT1** | **TBOT2** | **GRATE** |
| Model A | Constant Population | 1 | 5,109,992 |  |  |  |  |  |  |  |
| Model B | Exponential Growth | 3 | 10,941,722 | 2,781,199 |  |  |  |  |  | -2.31E-07 |
| Model C | One Bottleneck | 3 | 4,037,351 | 5,232,361 |  |  | 1,770 |  |  |  |
| Model D | One Bottleneck + Instantaneous Growth | 5 | 8,721,491 | 2,451,426 | 2,397,031 |  | 3,812,522 | 3,859,584 |  |  |
| **Model E** | **One Bottlenecks + Exponential Growth** | **6** | **8,905,797** | **2,501,615** | **2,300,835** |  | **3,934,603** | **3,984,700** |  | **-1.19E-09** |
| Model F | Two Bottleneck | 5 | 1,979,702 | 5,173,240 | 3,810,337 |  | 1,480 | 3,583 |  |  |
| Model G | Two Bottlenecks + Instantaneous Growth | 7 | 8,627,963 | 2,694,107 | 2,371,060 | 2,558,417 | 3,542,173 | 3,586,444 | 3,624,598 |  |
| Model H | Two Bottlenecks + Exponential Growth | 8 | 7,714,643 | 5,154,077 | 4,363,549 | 5,080,422 | 7,688 | 12,531 | 99,458 | -3.03E-05 |

**Supplementary Figures**


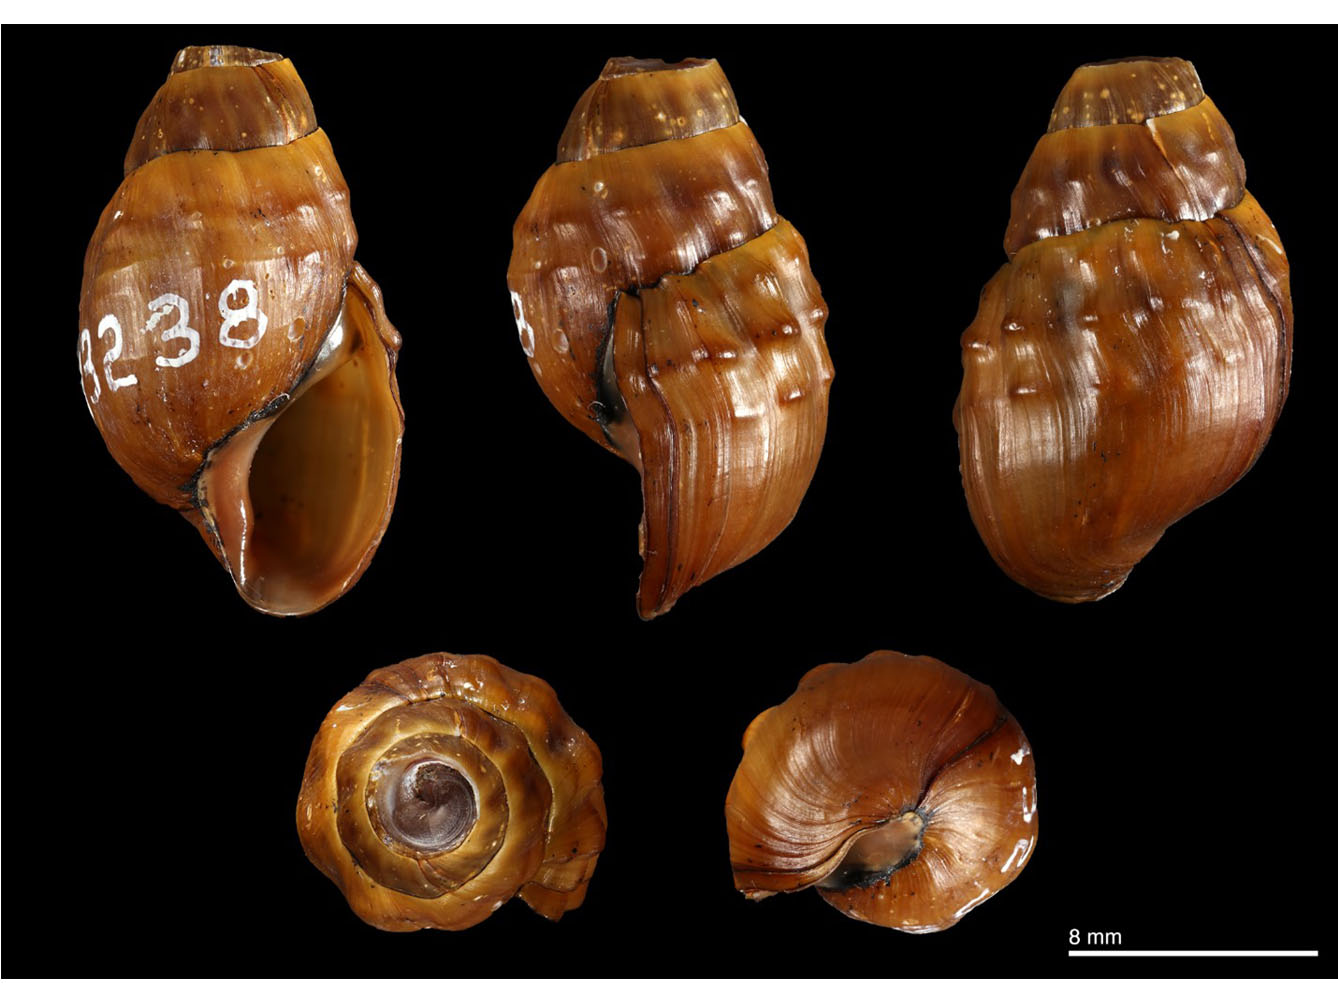


Figure S1. Photographs of *Lithasia hubrichti* specimen (OSM 13238.1) collected in 1963.


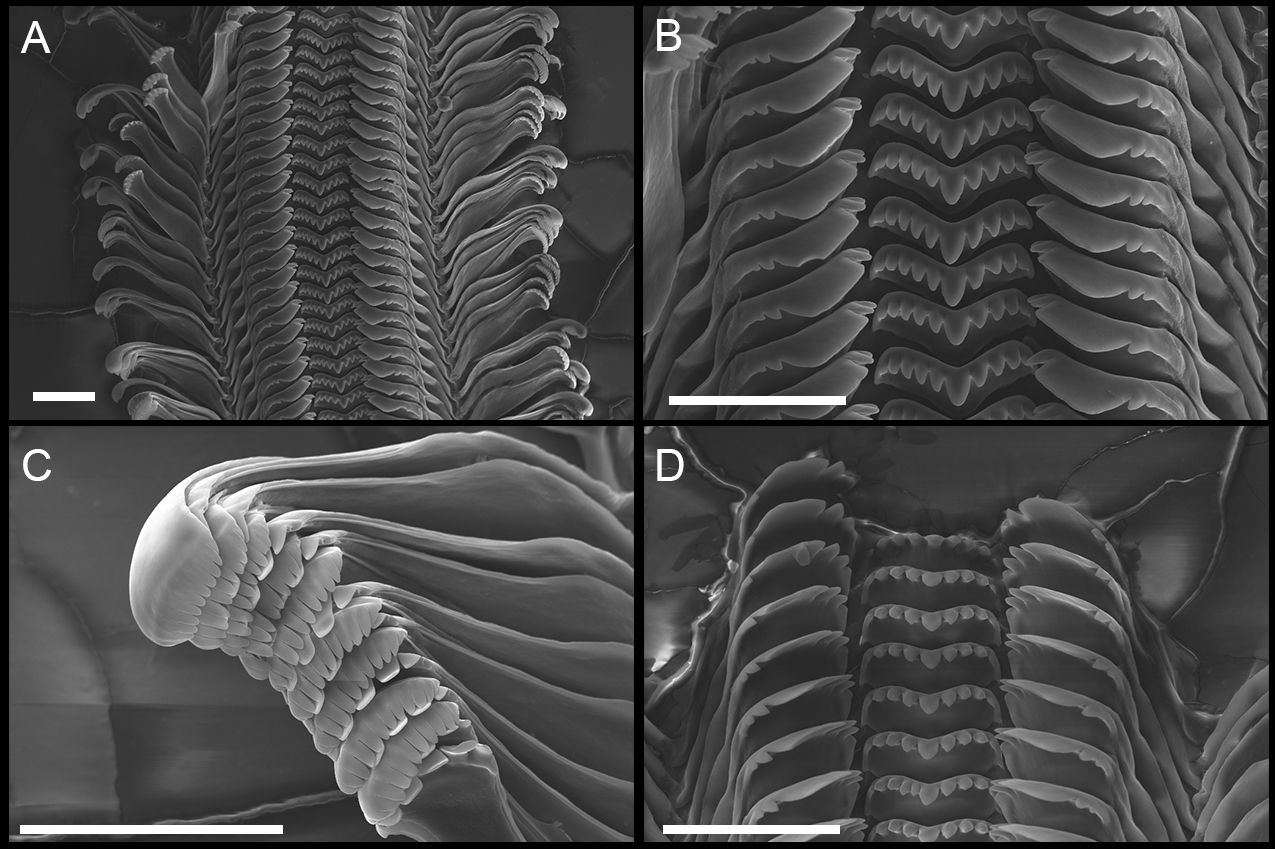


Figure S2. Scanning electron microscope photos of *L. hubrichti* radulae. A) Full view of the radula, B) central rachidian and lateral teeth, C) marginal teeth, D) central rachidian and lateral teeth viewed from ~45° angle. Scale bar = 100 µm.


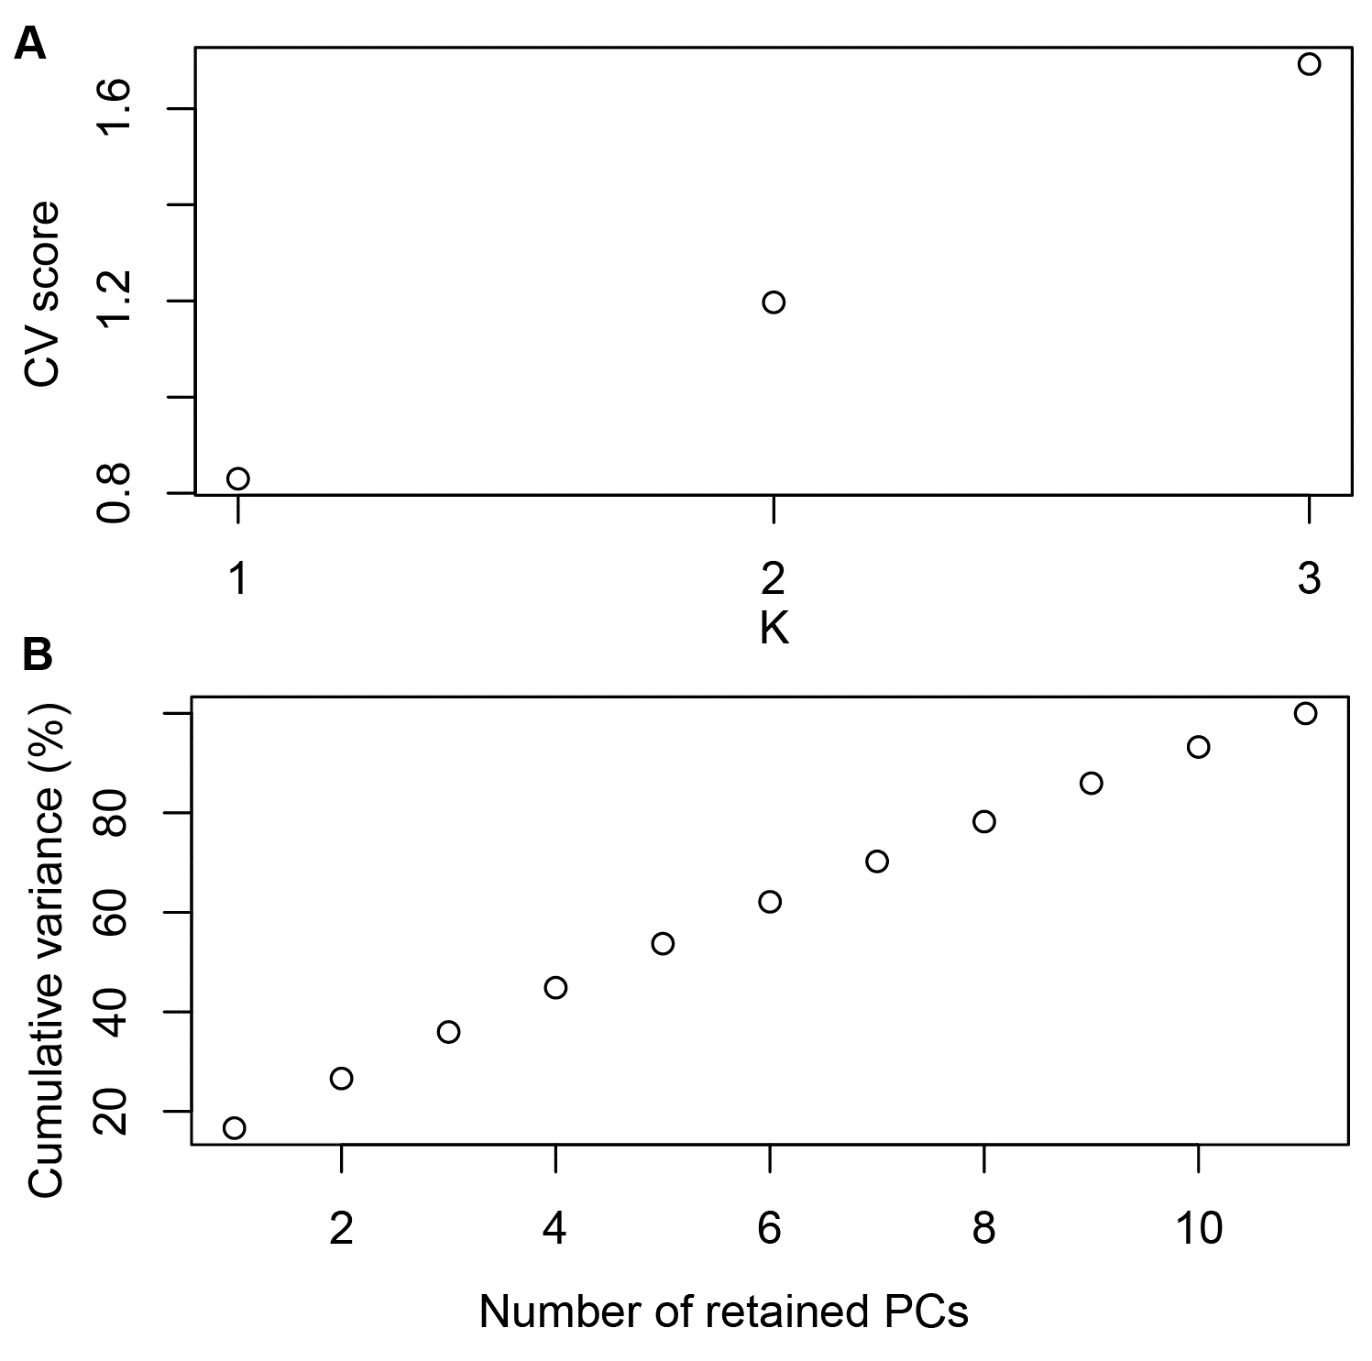


Figure S3. Results of test for best-fit number of genetic clusters present in data. A) Average cross-validation (CV) scores of ADMIXTURE results across 2- replicates per K. B) Cumulative variance in number of retained PCs. For both, the lower values represent better fit to data.


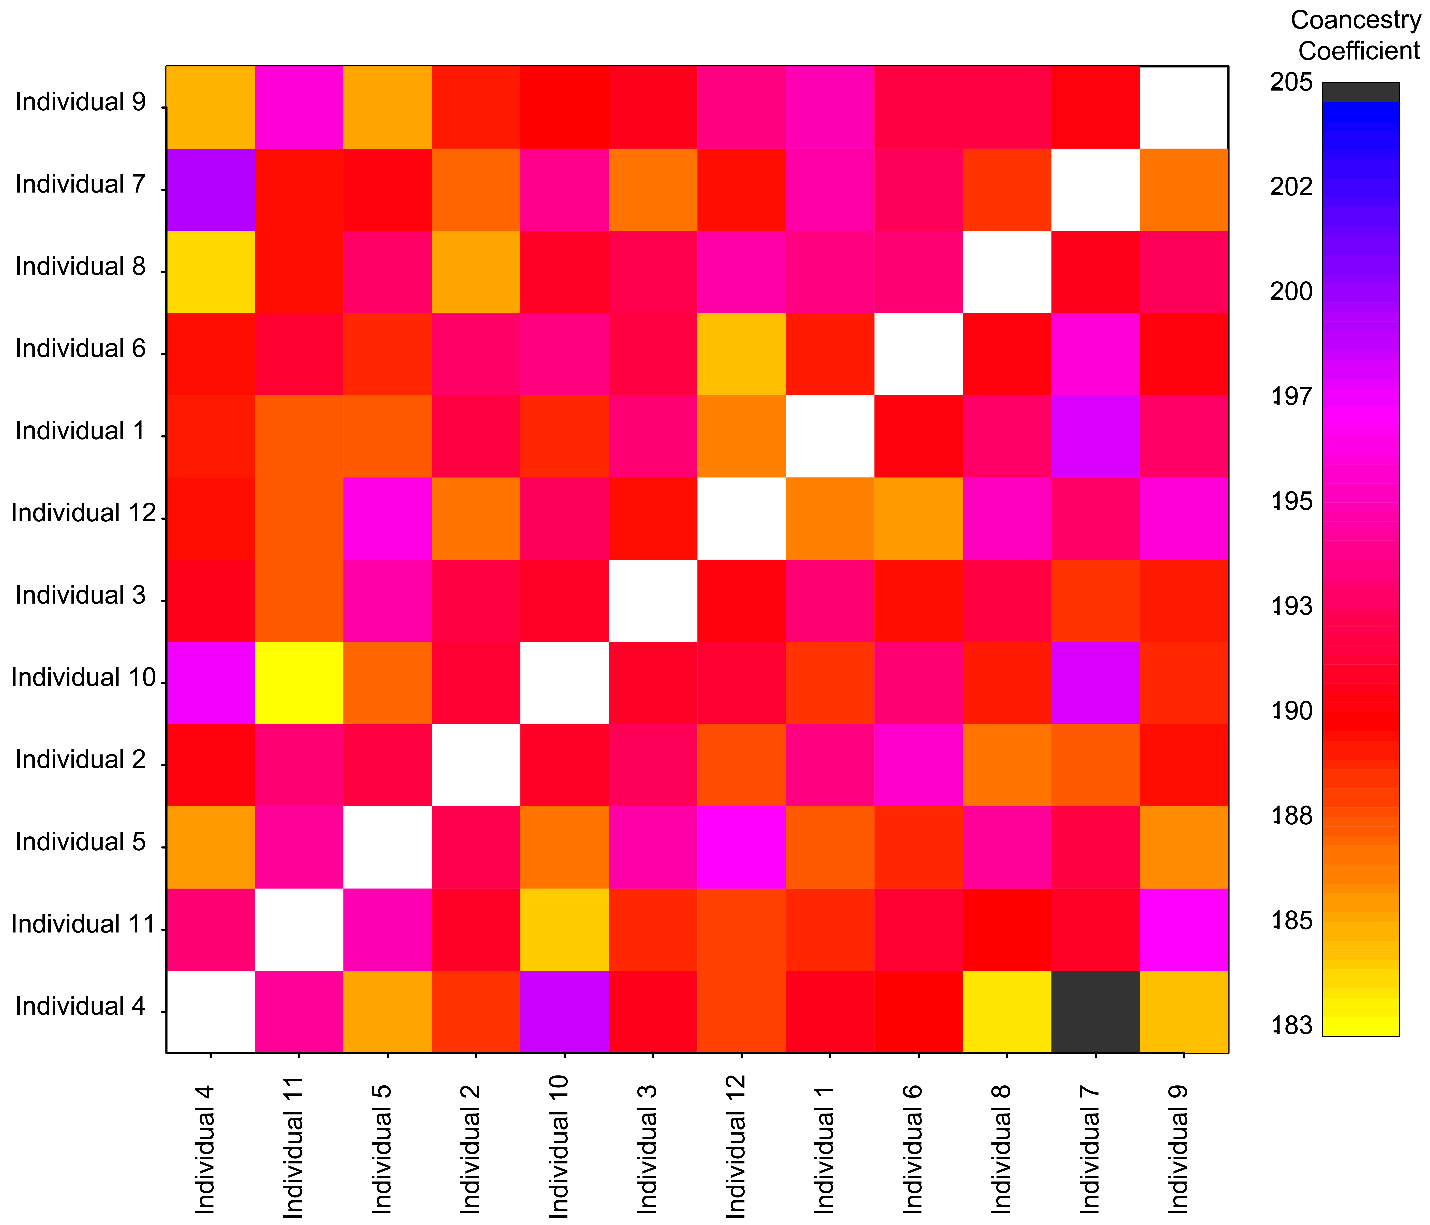


Figure S4. fineRADstructure co-ancestry plot.
